# Supplementary material for: Absence of Entourage: Terpenoids Commonly Found in Cannabis sativa Do Not Modulate the Functional Activity of Δ9-THC at Human CB1 and CB2 Receptors
Source: PubMed Central journal article supplement (PMC6757242; doi:10.1089/can.2019.0016), 2019-09-23
Supplement: Supp_Fig1.pdf [file Supp_Fig1.pdf]

## Supplementary Data

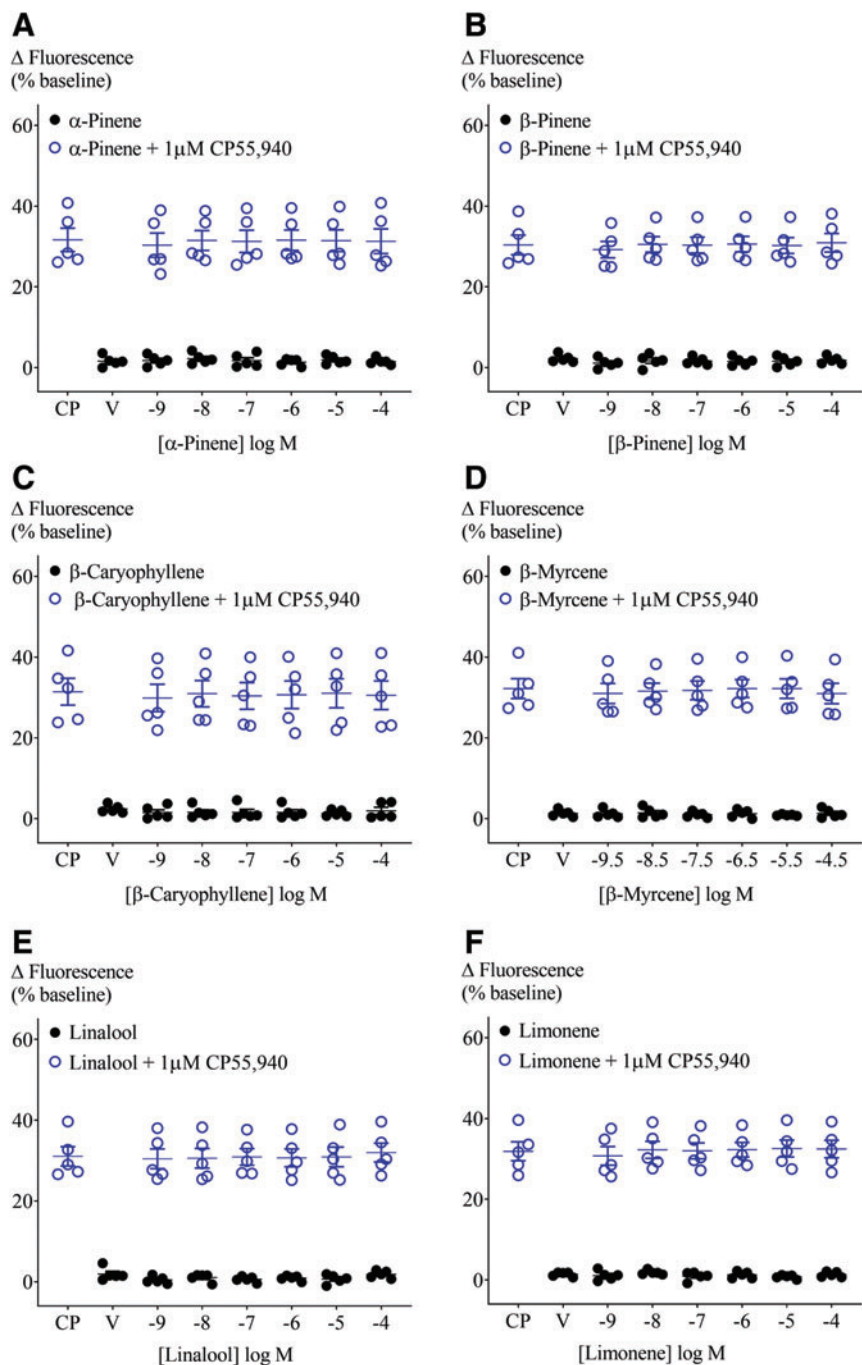

**SUPPLEMENTARY FIG. S1.** Effect of terpenoids at varying concentrations on AtT20-CB<sub>2</sub> membrane potential and on 1  $\mu$ M CP55,940-induced hyperpolarization. Terpenoids **(A)**  $\alpha$ -pinene, **(B)**  $\beta$ -pinene, **(C)**  $\beta$ -caryophyllene, **(D)**  $\beta$ -myrcene, **(E)** linalool, and **(F)** limonene were added to AtT20-CB<sub>2</sub> cells and incubated for 5 min. Maximum fluorescence changes were determined and compared with negative control (HBSS, closed circles). No significant fluorescence difference was observed when comparing means of terpenoids and HBSS ( $n=5$ , SEM, unpaired  $t$ -test  $p=0.72$ ). CP55,940 (1  $\mu$ M) addition to AtT20-CB<sub>2</sub> cells induced fluorescence changes from  $30.4\% \pm 2.4\%$  to  $32.2\% \pm 2.5\%$ . Peak CP55,940 responses were not affected by the presence of terpenoids (open circles,  $n=5$ , SEM, unpaired  $t$ -test  $p>0.09$ ). CB<sub>2</sub>, cannabinoid receptor 2; HBSS, Hank's Balanced Salt solution; SEM, standard error of the mean; V, vehicle
