# Supplementary material for: Absence of Entourage: Terpenoids Commonly Found in Cannabis sativa Do Not Modulate the Functional Activity of Δ9-THC at Human CB1 and CB2 Receptors
Source: PubMed Central journal article supplement (PMC6757242; doi:10.1089/can.2019.0016), 2019-09-23
Supplement: Supp_Fig2.pdf [file Supp_Fig2.pdf]

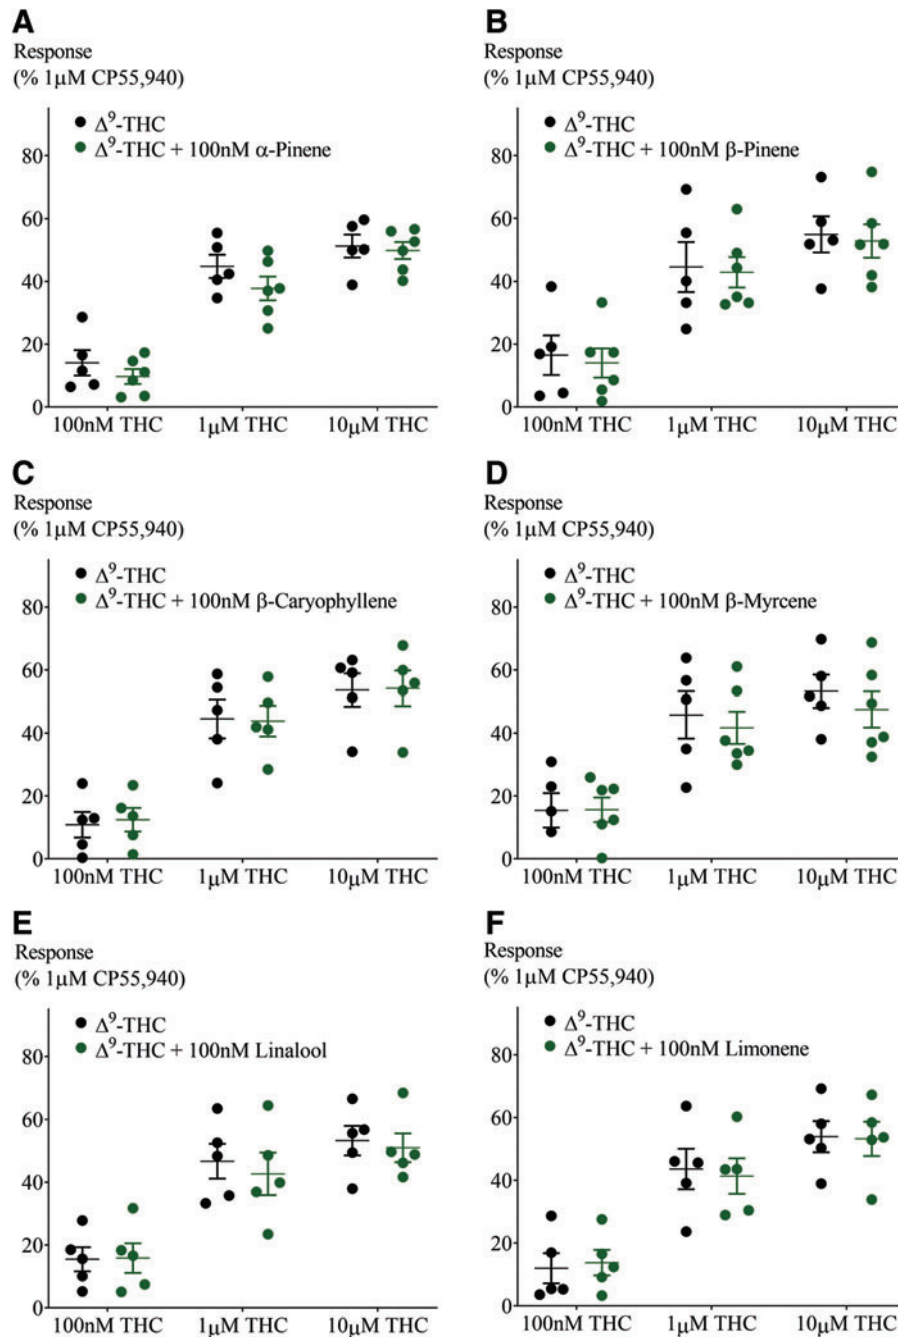

**SUPPLEMENTARY FIG. S2.** Effect of 100 nM terpenoids on peak hyperpolarization induced by  $\Delta^9$ -THC in AtT20-CB<sub>1</sub> cells. Terpenoids tested were **(A)**  $\alpha$ -pinene, **(B)**  $\beta$ -pinene, **(C)**  $\beta$ -caryophyllene, **(D)**  $\beta$ -myrcene, **(E)** linalool, and **(F)** limonene. Response to  $\Delta^9$ -THC at two submaximal and one maximal concentration ( $n = 5$ , SEM, unpaired  $t$ -test  $p > 0.24$ ). Data presented as % of maximum CP55,940 (1  $\mu$ M) response.  $\Delta^9$ -THC,  $\Delta^9$ -tetrahydrocannabinol; CB<sub>1</sub>, cannabinoid receptor 1.
