# Supplementary material for: Absence of Entourage: Terpenoids Commonly Found in Cannabis sativa Do Not Modulate the Functional Activity of Δ9-THC at Human CB1 and CB2 Receptors
Source: PubMed Central journal article supplement (PMC6757242; doi:10.1089/can.2019.0016), 2019-09-23
Supplement: Supp_Fig3.pdf [file Supp_Fig3.pdf]

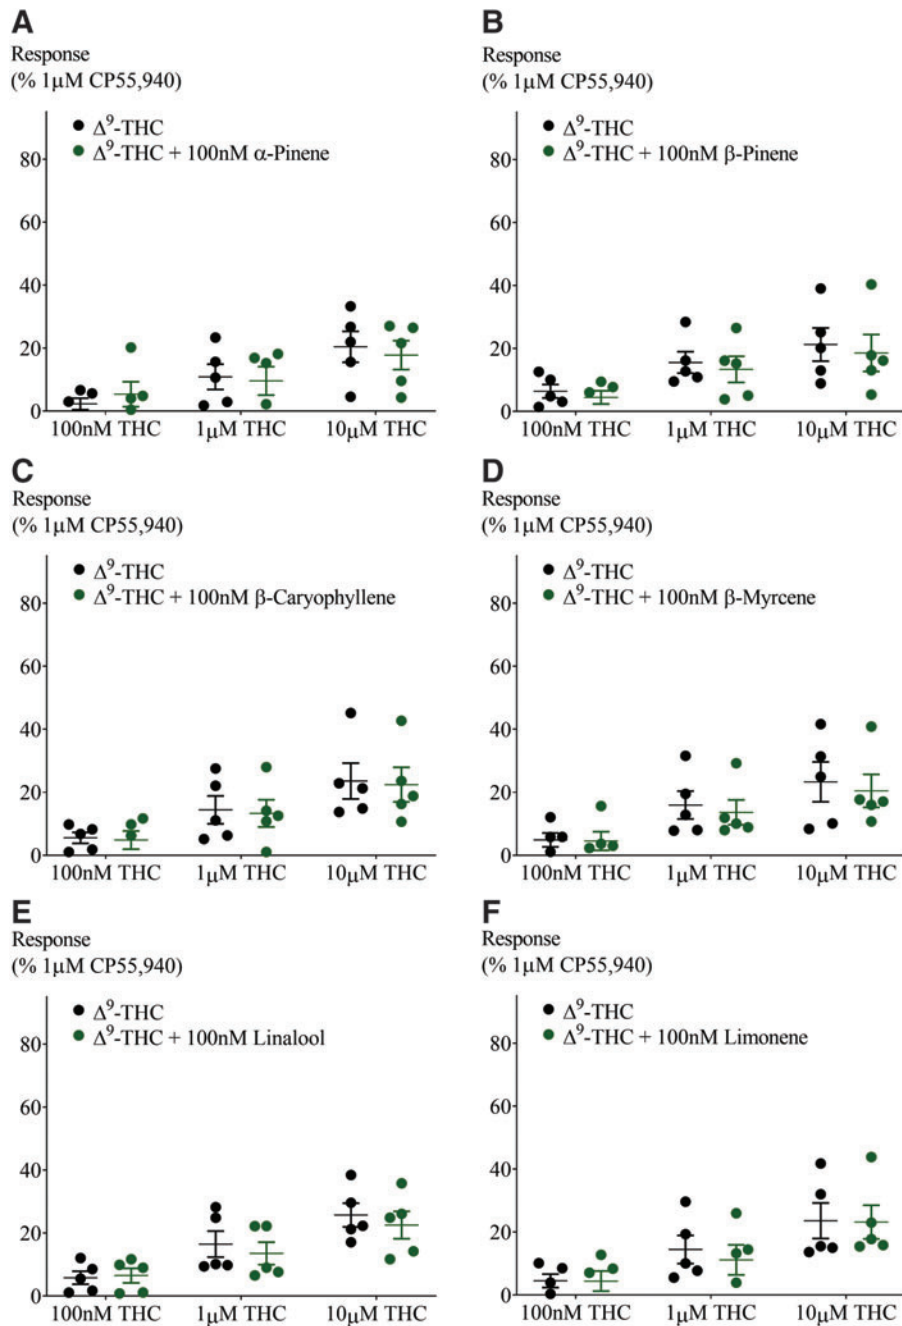

**SUPPLEMENTARY FIG. S3.** Effect of 100 nM terpenoids on peak hyperpolarization induced by  $\Delta^9$ -THC in AtT20-CB<sub>2</sub> cells. Terpenoids tested were (A)  $\alpha$ -pinene, (B)  $\beta$ -pinene, (C)  $\beta$ -caryophyllene, (D)  $\beta$ -myrcene, (E) linalool, and (F) limonene. Response to  $\Delta^9$ -THC at two submaximal and one maximal concentration ( $n=5$ , SEM, unpaired  $t$ -test  $p > 0.50$ ). Data presented as % of maximum CP55,940 (1  $\mu$ M) response.
